# Supplementary material
Source: publisher figshare collection journal article supplement (https://diabetesjournals.figshare.com/ndownloader/files/22693385)
Supplement: Supplementary file 1 [file 22693385]

## Sheet: Sheet1
Supplementary table 1 - Primary antibodies
	Antibodies	Source	Product Number	Species	Dilution Factor
1	Anti-Grp94	Cell Signaling Technology	20292P	Rabbit monoclonal	1/1000
2	Anti-mouse BiP	Dr Linda Hendershot's Lab		Rabbit monoclonal	1/1000
3	Anti-human BiP	Cell Signaling Technology	(C50B12) 3177	Rabbit	1/1000
4	Anti-ERDJ5	ProteinTech	13101-1-AP	Rabbit Polyclonal	1/1000
5	Anti-PRDX4	R&D System	AF5460	Goat Polyclonal	1/1000
6	Anti-PRDX4-HRP	LSBio	LS-C713462	Rabbit Polyclonal	1/1000
7	Anti-PRDX-SO3	Abcam	ab16830	Rabbit polyclonal	1/1000
8	Anti-rat proinsulin (CCI-17)	Hystest	2PR8	Mouse monoclonal	1/10,000
9	Anti-Myo18	ProteinTech	14611	Rabbit polyclonal	1/1000
10	Anti-GAPDH-HRP	GeneTex	GTX627408-01	Mouse	1/100,000
11	Anti-Myc tag	Abcam	ab32	Mouse	1/1000
12	Anti-rabbit vinculin	ProteinTech	66305-1-lg	Mouse monoclonal	1/1000
13	Anti-vinculin	Cell Signaling Technology	4650S	Rabbit	1/1000
14	Anti-human proinsulin (20G11)	Dr William E. Balch's Lab		Mouse monoclonal	1/1000
15	Anti-insulin	Dr Peter Arvan's Lab		Guinea pig	1/1000
